# Supplementary material
Source: Springer Nature journal article supplement (https://www.springermedizin.de/resource/supplementary/13012_2011_442_MOESM6_ESM.pdf/9630150)
Supplement: MOESM6 [file 9630150]

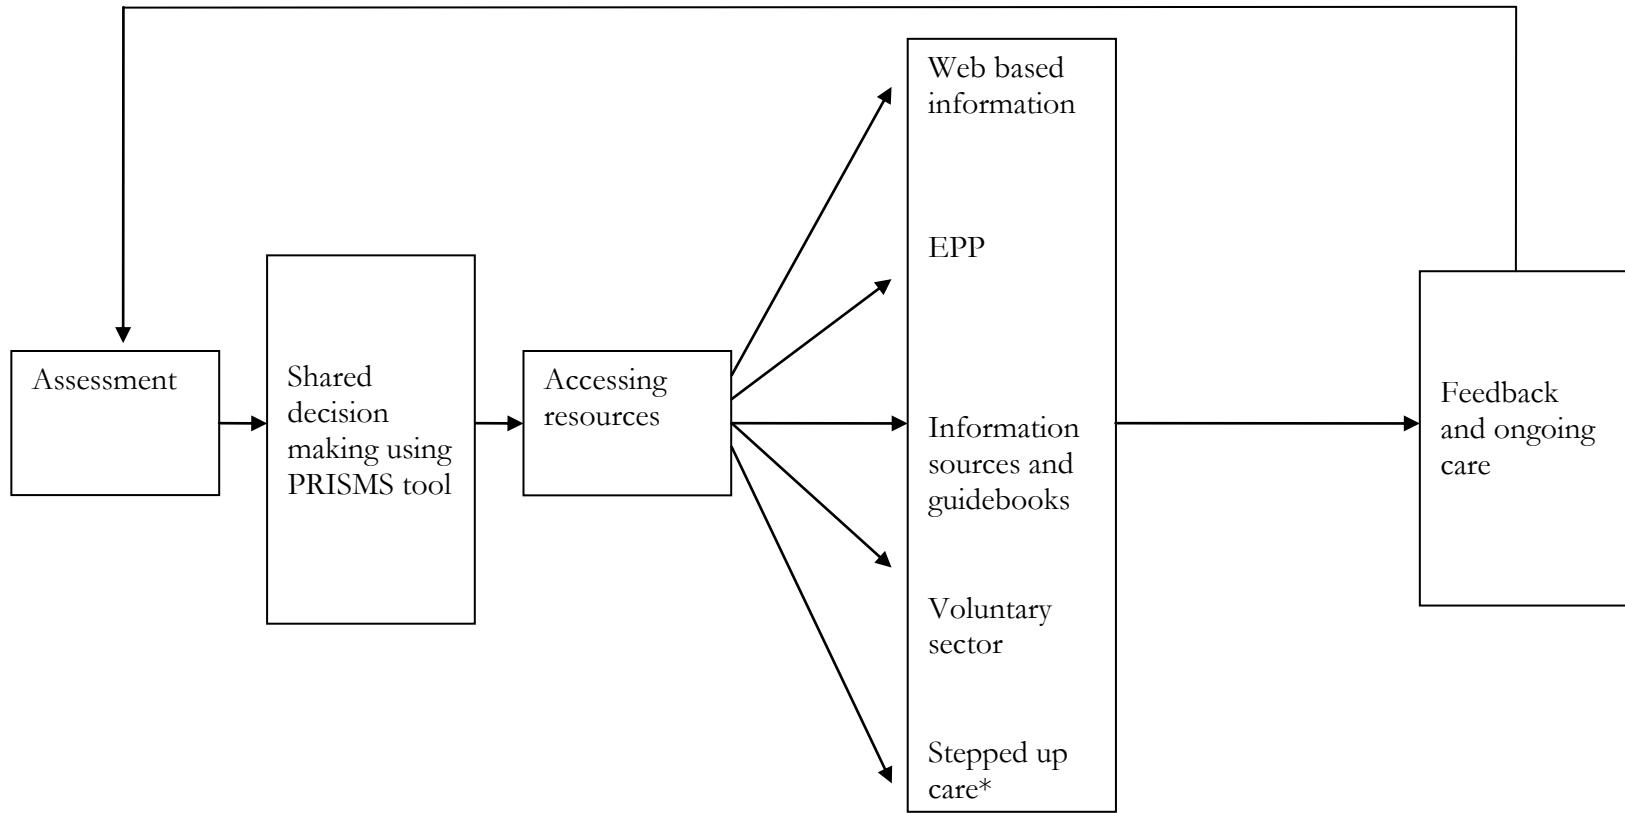

\* 'Stepped up care' refers to the provision of psychological therapies (CBT and hypnotherapy), which are part of the study protocol for the management of IBS patients only
